# Supplementary material
Source: PubMed Central journal article supplement (PMC3183228)
Supplement: NIHMS313047-supplement-05.pdf [file NIHMS313047-supplement-05.pdf]

Supplemental Table 1. Genes upregulated by Hoxb1b.

|    | Genbank  | Fold Change | p value  | Description (Compugen Annotation)                                                                                                                                                                                                                                      |
|----|----------|-------------|----------|------------------------------------------------------------------------------------------------------------------------------------------------------------------------------------------------------------------------------------------------------------------------|
| 1  | X70322   | 21.93       | 0.0178   | B.erio zf Krx-20 mRNA.; Early growth response 2b                                                                                                                                                                                                                       |
| 2  | AF071245 | 19.48       | 0.00763  | Danio rerio homeobox protein (hoxa3a) mRNA, complete cds.; Homeo box A3a                                                                                                                                                                                               |
| 3  | AB006322 | 17.67       | 0.0101   | Danio rerio mRNA for transcription factor MafB, complete cds.; V-maf myelocytomatous oncogene family, protein B (avian)                                                                                                                                                |
| 4  | A1601442 | 14.32       | 0.0248   | fc11c10.x1 Zebrafish WashU MPIMG EST Danio rerio cDNA clone IMAGE:3721074 3', mRNA sequence.; Wu:fc11c10                                                                                                                                                               |
| 5  | Y13944   | 10.78       | 0.00766  | Danio rerio mRNA for Hoxb3 protein.; Homeo box B3a                                                                                                                                                                                                                     |
| 6  | AW184433 | 8.862       | 0.000554 | f14b06.y1 Zebrafish adult olfactory Danio rerio cDNA 5' similar to SW:CD20_HUMAN P11836 B-LYMPHOCTYTE ANTIGEN CD20 ;, mRNA sequence.; Wu:fj02f05                                                                                                                       |
| 7  | AW281753 | 8.679       | 0.00399  | f56b03.x1 zebrafish adult brain Danio rerio cDNA 3', mRNA sequence.; Wu:f56b03                                                                                                                                                                                         |
| 8  | AI667023 | 8.413       | 0.0094   | fc24f10.y1 Zebrafish WashU MPIMG EST Danio rerio cDNA clone IMAGE:3722347 5', mRNA sequence.; Zgc:91987                                                                                                                                                                |
| 9  | AF307010 | 8.24        | 0.00124  | Danio rerio transcription factor Hoxa2 (Hoxa2) mRNA, complete cds.; Homeo box A2b                                                                                                                                                                                      |
| 10 | AF071568 | 7.937       | 0.000661 | expressed in rhombomeres 3, 4, 5, expressed at low levels in rhombomere 7 posteriorly into the spinal cord; expressed in head neural crest at 24 hpf. Danio rerio homeobox transcription factor (hoxb2a) mRNA, complete cds.; Homeo box B2a                            |
| 11 | BI671376 | 7.285       | 0.0121   | fp54e10.x1 Zebrafish adult retina cDNA Danio rerio cDNA clone IMAGE:4786675 3' similar to contains element MER16 repetitive element ;, mRNA sequence.; Sb.cb1035                                                                                                       |
| 12 | AF124095 | 7.197       | 0.0134   | Danio rerio iroquois homeobox protein Ziro3 (Ziro3) mRNA, complete cds.; Iroquois homeobox protein 3a                                                                                                                                                                  |
| 13 | AI641757 | 6.994       | 0.0144   | fc23f06.x1 Zebrafish WashU MPIMG EST Danio rerio cDNA clone IMAGE:3722243 3', mRNA sequence.; Wu:fc23f06                                                                                                                                                               |
| 14 | AI957504 | 6.831       | 0.00842  | fc92f01.x1 Zebrafish WashU MPIMG EST Danio rerio cDNA clone IMAGE:3728857 3', mRNA sequence.; Wu:fd06c09                                                                                                                                                               |
| 15 | U40995   | 6.704       | 0.00238  | Danio rerio Hox-a1 gene, complete cds.                                                                                                                                                                                                                                 |
| 16 | AF222996 | 5.993       | 0.00136  | Danio rerio noca-like Zn-finger protein (niz) mRNA, complete cds.; Noca related zinc finger 1                                                                                                                                                                          |
| 17 | AF052249 | 5.824       | 0.0322   | winged helix protein; Danio rerio fork head domain protein FKD6 (fk6d) mRNA, complete cds.; Forkhead box D3                                                                                                                                                            |
| 18 | BM024206 | 5.448       | 0.000304 | fu47e09.x1 zebrafish adult brain Danio rerio cDNA clone IMAGE:5332697 3', mRNA sequence.; Cytochrome P450, family 26, subfamily b, polypeptide 1                                                                                                                       |
| 19 | AI942951 | 5.435       | 0.00149  | fc79g06.x1 Zebrafish WashU MPIMG EST Danio rerio cDNA clone IMAGE:3727642 3', mRNA sequence.; Transcribed locus                                                                                                                                                        |
| 20 | AI878761 | 5.409       | 0.025    | fc66b04.x1 Zebrafish WashU MPIMG EST Danio rerio cDNA clone IMAGE:3726319 3', mRNA sequence.; Sb:cb3                                                                                                                                                                   |
| 21 | AA494787 | 5.28        | 5.97E-05 | fa12f06.s1 Zebrafish ICRF-zfIs Danio rerio cDNA clone 8M18 3' similar to contains element MER11 MER11 repetitive element ;, mRNA sequence.                                                                                                                             |
| 22 | AI793592 | 4.955       | 0.00332  | fc51e09.x1 Zebrafish WashU MPIMG EST Danio rerio cDNA clone IMAGE:3724936 3', mRNA sequence.; Wu:fc51e09                                                                                                                                                               |
| 23 | BE200897 | 4.895       | 0.0119   | fk83c05.y1 Zebrafish Research Genetics C32 fin Danio rerio cDNA 5' similar to SW:PP11_HUMAN P21128 PLACENTAL PROTEIN 11 PRECURSOR ;, mRNA sequence.; ELAV (embryonic lethal, abnormal vision, Drosophila)-like 3 (Hu antigen C)                                        |
| 24 | AI461323 | 4.866       | 0.0239   | fb40g10.x1 Zebrafish WashU MPIMG EST Danio rerio cDNA clone IMAGE:3714402 3', mRNA sequence.; Transcribed locus                                                                                                                                                        |
| 25 | AF071251 | 4.701       | 9.15E-05 | Danio rerio homeobox protein (hoxb1a) gene, complete cds.                                                                                                                                                                                                              |
| 26 | AI793934 | 4.644       | 0.0416   | fc56c09.x1 Zebrafish WashU MPIMG EST Danio rerio cDNA clone IMAGE:3725392 3', mRNA sequence.; Wu:fc56c09                                                                                                                                                               |
| 27 | BM154967 | 4.535       | 0.00121  | f91h04.y1 Zebrafish SJD adult male II Danio rerio cDNA clone IMAGE:5544798 5' similar to SW:CRG3_CYPCA P28022 GAMMA CRYSTALLIN M3 ;contains element OFR OFR repetitive element ;, mRNA sequence.                                                                       |
| 28 | AF398433 | 4.226       | 0.0257   | Danio rerio iroquois homeodomain transcription factor Ziro7 mRNA, complete cds.; Iroquois homeobox protein 7                                                                                                                                                           |
| 29 | AW567515 | 4.167       | 0.00555  | fk28d05.x1 zebrafish fin day1 regeneration Danio rerio cDNA 3', mRNA sequence.; Wu:fk14g08                                                                                                                                                                             |
| 30 | AW233713 | 4.072       | 0.011    | f40g04.x1 zebrafish adult brain Danio rerio cDNA 3', mRNA sequence.; Wu:f40g04                                                                                                                                                                                         |
| 31 | BI534285 | 3.806       | 0.0208   | fr8g05.x1 zebrafish adult brain Danio rerio cDNA clone IMAGE:4967985 3', mRNA sequence.; Transcribed locus                                                                                                                                                             |
| 32 | AW279672 | 3.718       | 0.0111   | f43a10.x1 zebrafish adult brain Danio rerio cDNA 3', mRNA sequence.; Retinol dehydrogenase 12 (all-trans and 9-cis)                                                                                                                                                    |
| 33 | BF938272 | 3.647       | 0.00929  | fm74f02.y1 Zebrafish adult retina cDNA Danio rerio cDNA clone IMAGE:4201107 5', mRNA sequence.                                                                                                                                                                         |
| 34 | BG304213 | 3.628       | 0.0115   | f133a10.x1 Sugano Kawakami zebrafish DRA Danio rerio cDNA clone IMAGE:3815347 3', mRNA sequence.; Wu:fc41f04                                                                                                                                                           |
| 35 | BI430048 | 3.531       | 0.00103  | fs6f12.y1 Zebrafish neuronal Danio rerio cDNA clone IMAGE:5076646 5', mRNA sequence.; Transcribed locus                                                                                                                                                                |
| 36 | BG985673 | 3.5         | 0.0136   | 2025 NICHD_Zebrafish_normalized_1 Danio rerio cDNA clone 2025, mRNA sequence.; Id:ibd2025                                                                                                                                                                              |
| 37 | AF359423 | 3.291       | 0.00708  | Danio rerio claudin a (clna) mRNA, complete cds.; Claudin a                                                                                                                                                                                                            |
| 38 | AI721660 | 3.281       | 0.00485  | fc30f10.x1 Zebrafish WashU MPIMG EST Danio rerio cDNA clone IMAGE:3722923 3', mRNA sequence.; Wu:fc30f10                                                                                                                                                               |
| 39 | BI845046 | 3.272       | 0.00975  | tq34h09.y1 zebrafish adult brain Danio rerio cDNA clone IMAGE:4833640 5', mRNA sequence.; Transcribed locus                                                                                                                                                            |
| 40 | AF222995 | 3.255       | 0.00085  | Danio rerio homeobox transcription factor Meis3 (meis3) mRNA, complete cds.; Myeloid ecotropic viral integration site 3                                                                                                                                                |
| 41 | BE693123 | 3.212       | 0.00948  | zeh0225f Zebrafish Embryonic Heart cDNA Library Danio rerio cDNA clone zeh0225 3', mRNA sequence.; Wu:fc37f07                                                                                                                                                          |
| 42 | AI965251 | 3.125       | 0.0202   | fb88e05.x1 Zebrafish WashU MPIMG EST Danio rerio cDNA clone IMAGE:3728480 3', mRNA sequence.; Wu:fc65f09                                                                                                                                                               |
| 43 | AI957828 | 3.095       | 0.00446  | fd06e12.x1 Zebrafish WashU MPIMG EST Danio rerio cDNA clone IMAGE:3730126 3' similar to SW:RHOE_HUMAN P52199 RHO-RELATED GTP-BINDING PROTEIN RHOE ;, mRNA sequence.; Wu:fd06e12                                                                                        |
| 44 | BI325759 | 3.075       | 0.014    | fr04e08.y1 zebrafish fin day3 regeneration Danio rerio cDNA clone 4927191 4927191 5' similar to SW:OIF_BOVIN P19879 OSTEOINDUCTIVE FACTOR PRECURSOR ;, mRNA sequence.                                                                                                  |
| 45 | BI890305 | 3.03        | 0.00503  | ZF637-2-002060 Zebrafish shield stage whole embryo cDNA library MPMGP637 Danio rerio cDNA clone MPMGP637_4N21:MPMGP637N214 5', mRNA sequence.; Sb:cb33                                                                                                                 |
| 46 | AW419653 | 2.944       | 0.0213   | fj81f11.y1 zebrafish gridded kidney Danio rerio cDNA 5', mRNA sequence.; Wu:fj81f11                                                                                                                                                                                    |
| 47 | AI957801 | 2.885       | 0.0223   | fd06a10.x1 Zebrafish WashU MPIMG EST Danio rerio cDNA clone IMAGE:3730074 3' similar to SW:ISH2_STOHE P81129 KUNITZ-TYPE PROTEINASE INHIBITOR SHPI-2 ;, mRNA sequence.; Transcribed locus, weakly similar to NP_031764.1 procollagen, type VII, alpha 1 [Mus musculus] |
| 48 | AW826481 | 2.825       | 0.0313   | fk62d09.x1 Zebrafish adult retina cDNA Danio rerio cDNA 3', mRNA sequence.; Transcribed locus                                                                                                                                                                          |
| 49 | BE201450 | 2.801       | 0.0257   | fk82h02.y1 Zebrafish Research Genetics C32 fin Danio rerio cDNA 3' similar to SW:F16P_RABIT P00637 FRUCTOSE-1,6-BISPHOSPHATASE ;, mRNA sequence.; Fructose-1,6-bisphosphatase 1, like                                                                                  |
| 50 | BG729476 | 2.78        | 0.0311   | fo5b08.y1 zebrafish gridded kidney Danio rerio cDNA clone IMAGE:4726623 5', mRNA sequence.; Wu:fa55e10                                                                                                                                                                 |
| 51 | BI880801 | 2.754       | 0.00476  | fm79h10.x1 zebrafish gridded kidney Danio rerio cDNA clone IMAGE:4234218 3', mRNA sequence.; Transcribed locus                                                                                                                                                         |
| 52 | AW420566 | 2.747       | 0.0121   | fj83b12.x1 zebrafish gridded kidney Danio rerio cDNA 3', mRNA sequence.; Wu:fj67h12                                                                                                                                                                                    |
| 53 | AF376049 | 2.742       | 0.00146  | Danio rerio transcription factor Meis4.1a (meis4.1a) mRNA, complete cds.; Myeloid ecotropic viral integration site 4.1a                                                                                                                                                |
| 54 | AY107309 | 2.732       | 0.00858  | Danio rerio iroquois homeobox protein Ziro5 (ziro5) mRNA, complete cds.; Iroquois homeobox protein 5                                                                                                                                                                   |
| 55 | AI722745 | 2.723       | 0.00152  | fc31a07.y1 Zebrafish WashU MPIMG EST Danio rerio cDNA clone IMAGE:3722964 5' similar to gb:X52611 TRANSCRIPTION FACTOR AP-2 (HUMAN);, mRNA sequence.; Transcription factor AP-2 alpha                                                                                  |
| 56 | BI982411 | 2.711       | 0.0121   | fu61g04.x1 zebrafish adult brain Danio rerio cDNA clone IMAGE:5333959 3', mRNA sequence.; Zgc:92325                                                                                                                                                                    |
| 57 | BM082504 | 2.657       | 0.0114   | fu22a10.y1 Campbell zebrafish ovary Danio rerio cDNA clone IMAGE:5306010 5' similar to TR:Q9UMX3 Q9UMX3 BCL-2-RELATED OVARIAN KILLER PROTEIN.;, mRNA sequence.; Zgc:64041                                                                                              |
| 58 | AF207751 | 2.621       | 0.0379   | Danio rerio zinc finger protein Zic2 (zic2) mRNA, complete cds.; Zic family member 2 (odd-paired homolog, Drosophila) b                                                                                                                                                |
| 59 | BG884411 | 2.565       | 0.0295   | fp33h08.x1 zebrafish gridded kidney Danio rerio cDNA clone IMAGE:4745318 3', mRNA sequence.; Transcription factor cmyb                                                                                                                                                 |
| 60 | AW115765 | 2.561       | 0.00751  | fd03b06.x1 Sugano Kawakami zebrafish DRA Danio rerio cDNA clone IMAGE:2600051 3', mRNA sequence.; Zgc:55283                                                                                                                                                            |
| 61 | AW567292 | 2.55        | 0.033    | fk24c03.x1 zebrafish fin day1 regeneration Danio rerio cDNA 3', mRNA sequence.; Muscle segment homeobox C                                                                                                                                                              |
| 62 | BI476891 | 2.508       | 0.0223   | fq95g07.y3 zebrafish fin day3 regeneration Danio rerio cDNA clone 4926517 4926517 5' similar to TR:Q9W635 Q9W635 MATRIX METALLOPROTEINASE-2.;, mRNA sequence.; Matrix metalloproteinase 2                                                                              |
| 63 | AA495100 | 2.5         | 0.00362  | fa06f01.s1 Zebrafish ICRF-zfIs Danio rerio cDNA clone 5F21 3', mRNA sequence.                                                                                                                                                                                          |
| 64 | BG304232 | 2.463       | 0.00766  | f133c07.x1 Sugano Kawakami zebrafish DRA Danio rerio cDNA clone IMAGE:3815437 3', mRNA sequence.; Zgc:66107                                                                                                                                                            |
| 65 | BI672091 | 2.425       | 0.0259   | ft34d03.x1 Gong zebrafish testis Danio rerio cDNA clone IMAGE:5152541 3', mRNA sequence.                                                                                                                                                                               |
| 66 | AA16207  | 2.425       | 0.0261   | fb19f03.y1 Zebrafish WashU MPIMG EST Danio rerio cDNA clone IMAGE:3712349 5' similar to contains element PTR5 repetitive element ;, mRNA sequence.; Wu:fb19f03                                                                                                         |
| 67 | BM070746 | 2.407       | 0.0233   | fu98g11.y1 zebrafish adult brain Danio rerio cDNA clone IMAGE:5385404 5' similar to contains element MER36 repetitive element ;, mRNA sequence.; Transcribed locus                                                                                                     |
| 68 | AI601770 | 2.401       | 0.00587  | fc11e07.x1 Zebrafish WashU MPIMG EST Danio rerio cDNA clone IMAGE:3721092 3', mRNA sequence.; Wu:fc11e07                                                                                                                                                               |
| 69 | BG728637 | 2.374       | 0.0056   | fo97d10.x1 zebrafish gridded kidney Danio rerio cDNA clone IMAGE:4727875 3', mRNA sequence.; Wu:fj66h02                                                                                                                                                                |

|     |          |       |          |                                                                                                                                                                                                                                              |
|-----|----------|-------|----------|----------------------------------------------------------------------------------------------------------------------------------------------------------------------------------------------------------------------------------------------|
| 70  | AF229448 | 2.371 | 0.0103   | Notch ligand; Danio rerio jagged1 (jag1) mRNA, complete cds.; Jagged 1a                                                                                                                                                                      |
| 71  | BG305680 | 2.336 | 0.0395   | fm07h05.x1 Zebrafish adult retina cDNA Danio rerio cDNA clone IMAGE:4145888 3', mRNA sequence.; Zgc:55817                                                                                                                                    |
| 72  | BM071271 | 2.314 | 0.00649  | fv05d01.x1 zebrafish adult brain Danio rerio cDNA clone IMAGE:5385648 3', mRNA sequence.; Transcribed locus, weakly similar to NP_612453.1 potassium channel tetramerisation domain containing 12 [Homo sapiens]                             |
| 73  | BG891906 | 2.313 | 0.000325 | fp46h04.x1 zebrafish gridded kidney Danio rerio cDNA clone IMAGE:4759903 3', mRNA sequence.; Transcribed locus, weakly similar to NP_849259.2 expressed sequence A1173486 [Mus musculus]                                                     |
| 74  | BM026691 | 2.278 | 0.0478   | fq86e06.y3 Zebrafish neuronal Danio rerio cDNA clone IMAGE:4887250 5', mRNA sequence.; Transcribed locus                                                                                                                                     |
| 75  | AF180890 | 2.265 | 0.0194   | Danio rerio fast skeletal muscle troponin C (tnnc) mRNA, complete cds.; Troponin C, fast skeletal                                                                                                                                            |
| 76  | BM185357 | 2.244 | 0.0359   | fv46b09.x1 Sugano SJD adult male Danio rerio cDNA clone IMAGE:5411297 3', mRNA sequence.                                                                                                                                                     |
| 77  | AA495154 | 2.244 | 0.0366   | fa04a07.x1 Zebrafish ICRFzfls Danio rerio cDNA clone 1M4 3' similar to contains element L1 repetitive element ;, mRNA sequence.                                                                                                              |
| 78  | BM182277 | 2.201 | 0.0196   | fv59f10.x1 Sugano SJD adult male Danio rerio cDNA clone IMAGE:5413002 3', mRNA sequence.; Matrix metalloproteinase 2                                                                                                                         |
| 79  | AF359505 | 2.145 | 0.0147   | Danio rerio iroquois homeobox protein Ziro1 (ziro1) mRNA, complete cds.; Iroquois homeobox protein 1, a                                                                                                                                      |
| 80  | A1793839 | 2.142 | 0.00831  | fc54h10.x1 Zebrafish WashU MPIMG EST Danio rerio cDNA clone IMAGE:3725251 3', mRNA sequence.; Transcription factor AP-2 alpha                                                                                                                |
| 81  | A1877490 | 2.14  | 0.0184   | fc48a02.y1 Zebrafish WashU MPIMG EST Danio rerio cDNA clone IMAGE:3724586 5', mRNA sequence.                                                                                                                                                 |
| 82  | A1436876 | 2.104 | 0.0163   | fb34b02.y1 Zebrafish WashU MPIMG EST Danio rerio cDNA clone IMAGE:3713739 5', mRNA sequence.; Wu:fb34b02                                                                                                                                     |
| 83  | AW232279 | 2.096 | 0.0452   | fj17b02.x1 Zebrafish adult olfactory Danio rerio cDNA 3' similar to TR:O88656 O88656 P41-ARC.; mRNA sequence.; Actin related protein 2/3 complex, subunit 1B                                                                                 |
| 84  | B1710499 | 2.094 | 0.00257  | fq37e09.x1 zebrafish adult brain Danio rerio cDNA clone IMAGE:4833521 3' similar to SW:RETS3_FUGRU O42386 RETINOIC ACID-BINDING PROTEIN I, CELLULAR.; mRNA sequence.; Cellular retinoic acid binding protein 1                               |
| 85  | AF282384 | 2.085 | 0.00613  | thin filament regulatory protein; contractile protein; sarcomere protein; Danio rerio cardiac troponin T (tnnt2) mRNA, complete cds.; Troponin T2, cardiac                                                                                   |
| 86  | BG727376 | 2.077 | 0.014    | fb81f01.x1 zebrafish gridded kidney Danio rerio cDNA clone IMAGE:4726417 3', mRNA sequence.; Wu:fa10d10                                                                                                                                      |
| 87  | U89380   | 2.071 | 0.0141   | Eph-like kinase 2; Zek2; Eph-like receptor tyrosine kinase; Danio rerio Eph-like kinase 2 (zek2) mRNA, partial cds.                                                                                                                          |
| 88  | AF210320 | 2.064 | 0.00865  | secreted protein; Danio rerio Sliit3 (sliit3) mRNA, complete cds.; Sliit (Drosophila) homolog 3                                                                                                                                              |
| 89  | AF277097 | 2.051 | 0.000699 | SRY-like; functional importance in chondrogenesis and gonadal tissues; Danio rerio HMG box transcription factor Sox9b (sox9b) mRNA, complete cds.; SRY-box containing gene 9b                                                                |
| 90  | U40931   | 2.051 | 0.00166  | Pax-family transcription factor; Danio rerio transcription factor Pax9a (Pax9) mRNA, complete cds.; Paired box gene 9                                                                                                                        |
| 91  | BM155853 | 2.048 | 0.0114   | fw40f05.y1 Zebrafish SJD day 3 embryo Danio rerio cDNA clone IMAGE:5567360 5' similar to SW:CRG2_CYPGA P10044 GAMMA CRYSTALLIN M2.; mRNA sequence.; Zgc:86750                                                                                |
| 92  | BM070961 | 2.038 | 0.008    | fv02g07.x1 zebrafish adult brain Danio rerio cDNA clone IMAGE:5385421 3' similar to SW:CART_MOUSE Q08331 CALRETININ.; mRNA sequence.; Calbindin 2, (calretinin)                                                                              |
| 93  | BM154194 | 2.035 | 0.0305   | fv85c06.x1 Zebrafish SJD adult male II Danio rerio cDNA clone IMAGE:5543818 3', mRNA sequence.; Transcribed locus, weakly similar to NP_075580.1 unconventional myosin Myr2 I heavy chain [Rattus norvegicus]                                |
| 94  | A1878476 | 2.026 | 0.0302   | fc59c11.x1 Zebrafish WashU MPIMG EST Danio rerio cDNA clone IMAGE:3725684 3', mRNA sequence.; Zgc:64055                                                                                                                                      |
| 95  | U00931   | 2.026 | 0.0443   | Brachydanio rerio DVR-1 mRNA, complete cds.; Decapentaplegic and Vg-related 1                                                                                                                                                                |
| 96  | A1793901 | 2.023 | 0.0304   | fc55h01.x1 Zebrafish WashU MPIMG EST Danio rerio cDNA clone IMAGE:3725329 3', mRNA sequence.                                                                                                                                                 |
| 97  | B1879932 | 2.021 | 0.0417   | fm67e01.x1 Zebrafish adult retina cDNA Danio rerio cDNA clone IMAGE:420648 3' similar to TR:Q9V5D4 Q9V5D4 CG1513 PROTEIN.; mRNA sequence.; Transcribed locus, weakly similar to NP_060254.2 oxysterol binding protein-like 10 [Homo sapiens] |
| 98  | BG727284 | 2.02  | 0.0307   | fo79a11.x1 zebrafish gridded kidney Danio rerio cDNA clone IMAGE:4726173 3', mRNA sequence.; Wu:fj84d07                                                                                                                                      |
| 99  | BG883367 | 2.019 | 0.00643  | fp27a05.x1 zebrafish gridded kidney Danio rerio cDNA clone IMAGE:4744232 3', mRNA sequence.; Transcribed locus, moderately similar to NP_766501.1 trinucleotide repeat containing 9 [Mus musculus]                                           |
| 100 | B1879661 | 2.001 | 0.00493  | fm63h08.x1 Zebrafish adult retina cDNA Danio rerio cDNA clone IMAGE:4200422 3' similar to contains element LTR7 repetitive element.; mRNA sequence.; Collagen type II, alpha-1                                                               |
